# Supplementary material for: Visualization and intracellular dynamic tracking of exosomes and exosomal miRNAs using single molecule localization microscopy
Source: Royal Society of Chemistry journal article supplement (doi:10.1039/c7nr08800k), 2018-01-01
Supplement: c7nr08800k6.pdf [file c7nr08800k6.pdf]

## **Supporting Information**

### **Visualization and Intracellular Dynamic Tracking of Exosomes and Exosomal miRNAs using Single Molecule Localization Microscopy**

*Chen Chen, Shenfei Zong, Zhuyuan Wang, Ju Lu, Dan Zhu, Yizhi Zhang, Ruohu Zhang, Yiping Cui\**

Advanced Photonics Center, Southeast University, Nanjing 210096, China

#### **Corresponding Author**

[\\*E-mail: cyp@seu.edu.cn](mailto:cyp@seu.edu.cn)

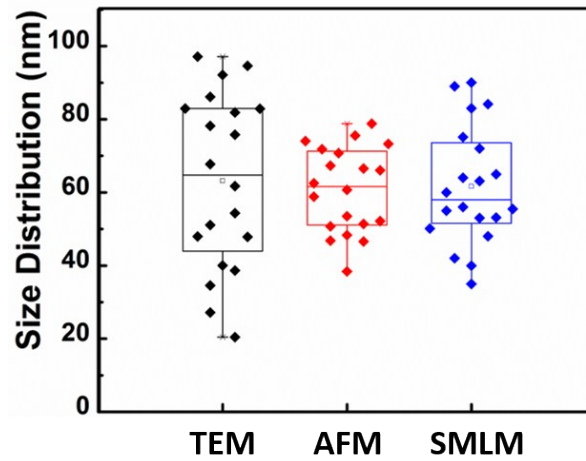

**Figure S1 size distribution of exosomes characterized by TEM, AFM and SMLM.**

Exosomes were stained with CM-DiI while acquiring SMLM images.

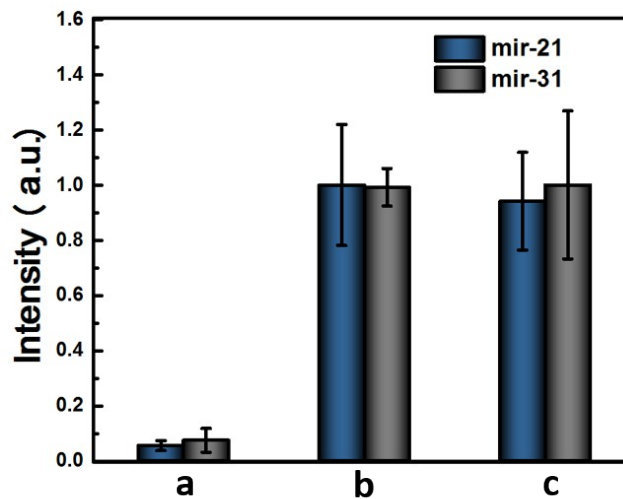

**Figure S2. Fluorescence intensity of MBs after RNase A treatment.** (a) Only MBs were added in the solution; (b) MBs were incubated with exosomes at 37 °C for 1.5 h. (c) Exosomes solution were incubated with sufficient RNase A (Beyotime, ST578, 10 mg/mL) for 30 min before adding the MBs for hybridization.

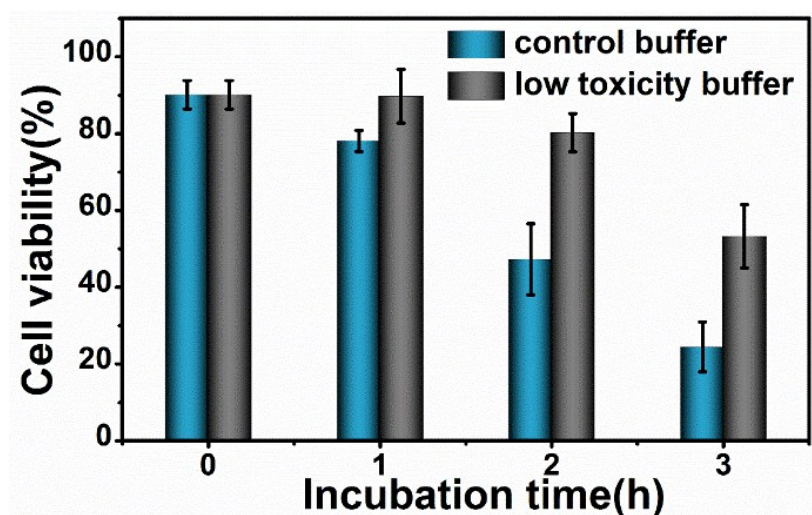

**Figure S3. Cell viability of PC12 cells incubated with low toxicity buffer and control buffer.** For cell viability assay, PC12 cells were incubated with two kinds of imaging buffers for different times after planted on Lab-Tek Chambered Coverglass for 24 h. Then, 1 mL of culture media containing 4  $\mu$ L of Propidium Iodide (PI, KG214, KeyGEN BioTECH) and 2  $\mu$ L of Calcein, AM (C3099, ThermoFisher Scientific) were added to label the cells for 5 minutes before imaging. Cell counting was performed using imageJ software (<https://imagej.nih.gov/ij/>).

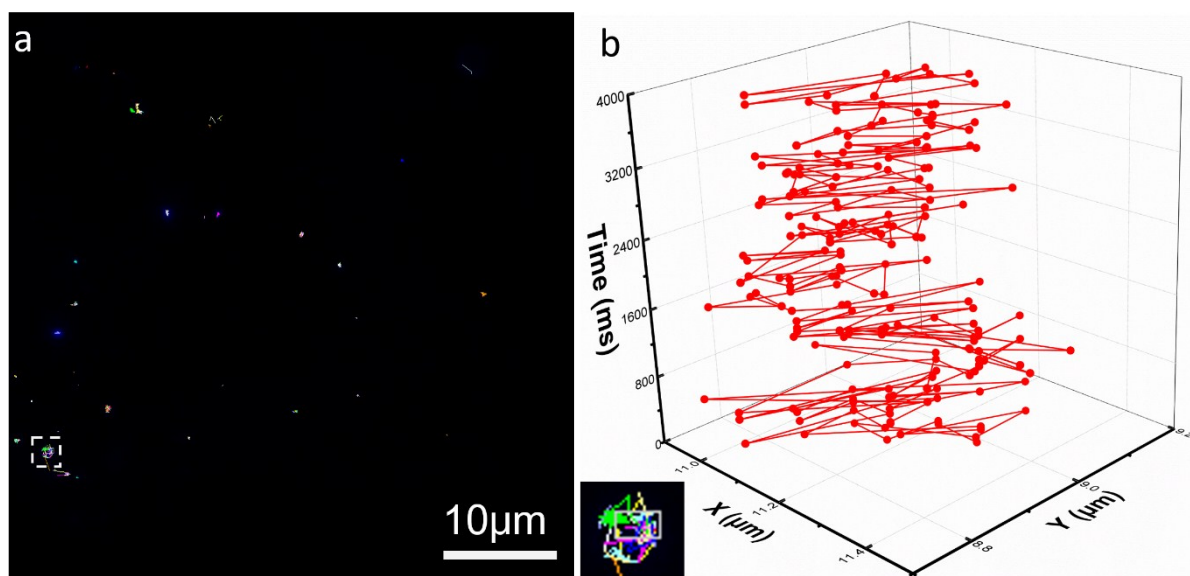

Figure S4 (a) Single particle tracking analysis of exosomes within 4 s. (b) The trajectory of the representative exosome in white rectangular region in (a) with respect to time.

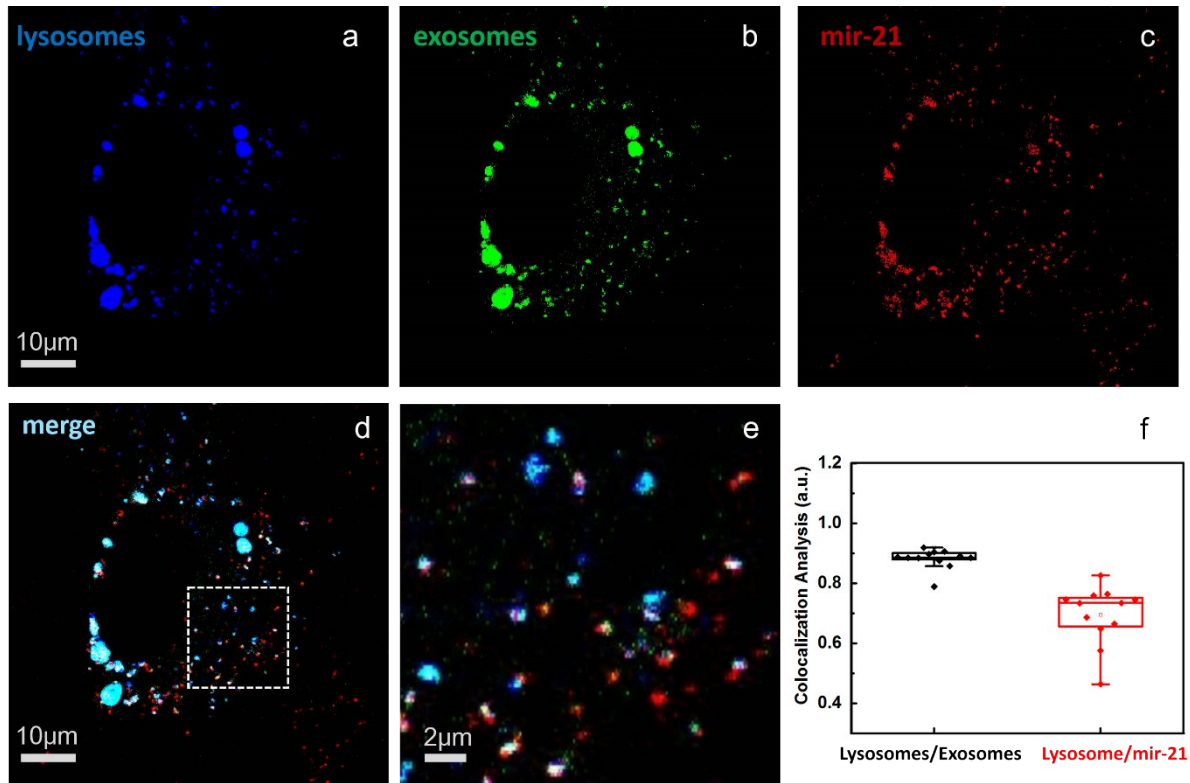

**Figure S5 Confocal cololization of exosomes, exosomal mir-21 and lysosomes in PC12 cells.** Exosomes were incubated with PC12 cells for 2h at 37°C, then 1mg/mL LysoTracker Green was added to label lysosomes at 37°C for 15 min. The confocal image of lysosomes (a), exosomes (b), exosomal mir-21(c) and merged channel (d), (e) enlarged image of the region indicated by the white box in (d). (f) The colocalization ratio between lysosomes and exosomal mir-21 was much lower compared with lysosomes and exosomes. It means that exosomal mir-21 can be released into cytoplasm.

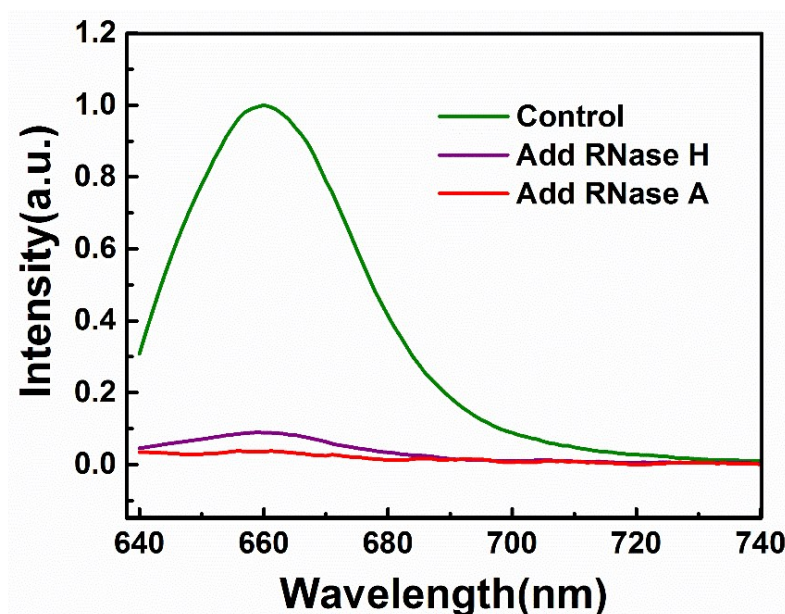

**Figure S6. RNase H cleavage assay in solution for evaluation of RNase H activity.** MB21 was incubated with synthetic mir-21 in solution for 1 h (PL spectra: green line), then sufficient RNase H (Beyotime, D7089) was added for cleavage (PL spectra: purple line). Meanwhile, RNase A was adopted to evaluate the degradability of RNase H (PL spectra: red line).

**Supplementary Movie 1.** The TIRF movie presenting the dynamic movements of exosomes in 4s.

**Supplementary Movie 2.** The super-resolution movie reveals the dynamic motions of exosomes within intercellular filamentous structures.

**Supplementary Movie 3.** The super-resolution video is merged with a wide field video of the cell.

**Supplementary Movie 4.** The super-resolution movie showing the dynamic movements of mir-21 in living cells.

**Supplementary Movie 5.** The super-resolution movie showing the release process of exosomal mir-21 in living cells.
